# Supplementary material for: Loss of NDRG2 Expression Confers Oral Squamous Cell Carcinoma with Enhanced Metastatic Potential
Source: Oxford University Press journal article supplement (doi:10.1158/0008-5472.can-16-2114), 2017-02-16
Supplement: 00085472can162114-sup-169538_1_supp_3799430_88vtbg.docx [file 00085472can162114-sup-169538_1_supp_3799430_88vtbg.docx]

Supplemental Tables

Supplemental Table 1. Expression rates of immunohistochemical staining of NDRG2 versus p-Akt or p-PTEN in tumors from OSCC patients

|  | p-Akt | | | p-PTEN | | |
| --- | --- | --- | --- | --- | --- | --- |
|  | Negative | Positive | p value | Negative | Positive | p value |
| NDRG2 |  |  | 0.097 |  |  | 0.312 |
| Negative | 2 | 32 | p<0.001 | 7 | 27 | p<0.001 |
| Positive | 2 | 6 |  | 3 | 5 |  |

Supplemental Table 2. Incidence of tumour formation in the tongue of

Ndrg2-deficient mice treated with 4-NQO for 16 weeks

|  |  | Papilloma | | SCC | | Total tumors | |
| --- | --- | --- | --- | --- | --- | --- | --- |
| Type of mice | No. of the mice | Incidene (%) | Multipliciy (No.) | Incidene (%) | Multipliciy (No.) | Incidene (%) | Multipliciy (No.) |
| Wild-type | 16 | 8 (50) | 0.8 ±1.0 | 2 (13) | 0.1±0.3 | 8 (50) | 0.9±1.1 |
| Ndrg2+/- | 21 | 15 (71) | 1.1±1.1 | 6 (29) | 0.3 ±0.6 | 16 (76) * | 1.5±1.3* |
| Ndrg2-/- | 10 | 8 (80) | 1.6±1.4 | 4 (40) | 0.5 ±0.5 | 9 (90) * | 2.1±1.7* |

*: p<0.05 vs Wild type

Supplemental Table 3. Frequency of SCC (squamous cell carcinoma) tumour formation in the tongue of Ndrg2-deficient mice treated with 4-NQO for 16 weeks

| Type of mice | No. of mice | Papillary type | | Invasive type | |
| --- | --- | --- | --- | --- | --- |
| Incidence (%) Multiplicity (No.) | | Incidence (%) Multiplicity(No.) | |
| Wild-type | 16 | 2 (13) | 0.1±0.3 | 0 (0) | 0.0±0.0 |
| Ndrg2+/- | 21 | 1 (5) | 0.0±0.2 | 5 (24) * | 0.3±0.6* |
| Ndrg2-/- | 10 | 2 (20) | 0.2±0.4 | 3 (30) * | 0.3±0.5* |

*: p<0.05 vs Wild type

Supplemental Table 4. Incidence of tumour formation in wild type and Ndrg2-deficient mice after treatment with 4-NQO for 30 weeks

| Type of mice | No. of mice | Papilloma | | SCC | | Total tumours | |
| --- | --- | --- | --- | --- | --- | --- | --- |
| Incidence Multiplicity  (%) (No.) | | Incidence Multiplicity  (%) (No.) | | Incidence Multiplicity  (%) (No.) | |
| Wild-type | 9 | 5 (56) | 1.7±2.3 | 6 (67) | 1.0±0.6 | 7 (78) | 1.7±1.0 |
| Ndrg2+/- | 9 | 8 (89) | 2.3±2.3 | 7 (78) | 1.6±0.9 | 8 (89) | 3.3±1.2 |
| Ndrg2-/- | 12 | 7 (58) | 1.2±1.2 | 12 (100) | 2.2±1.3* | 12 (100) | 3.3±1.0** |

*, **: p<0.05, p<0.01 vs Wild type, respectively

Supplemental Table 5. Incidence of tumour development in wild-type and Ndrg2-deficient mice treated with 4-NQO for 30 weeks

| Type of mice | No. of mice | Papillary type | Invasive type |
| --- | --- | --- | --- |
| Incidence (%) Multiplicity (No.) | Incidence (%) Multiplicity (No.) |
| Wild-type | 9 | 2 (22) 0.3±0.5 | 4 (44) 0.6±0.5 |
| Ndrg2+/- | 9 | 4 (44) 0.8±0.9 | 5 (56) 0.9±0.8 |
| Ndrg2-/- | 12 | 7 (58) 0.7±0.7 | 10 (83) 1.5±1.0* |

*: p<0.05 vs Wild type

Supplemental Table 6. Comparison of the frequency of cervical lymph node metastasis between wild-type control and Ndrg2-deficient mice

|  |  |  | No of cervical lymph nodes in whole group | | | No. of lymph nodes per mouse | |
| --- | --- | --- | --- | --- | --- | --- | --- |
|  | Total numbers | With metastasis (%) | Total numbers | With metastasis (%) | Without metastasis (%) | With Metastasis | Without metastasis |
| Wild-type | 9 | 3 (33) | 28 | 12 (43) | 16 (57) | 1.33±2.06 | 1.78±1.56 |
| Ndrg2+/- | 9 | 4 (44) | 21 | 15 (71) | 6 (29) | 1.67±2.06 | 0.67±0.86 |
| Ndrg2-/- | 12 | 7 (58) | 34 | 27 (79)* | 7 (21) * | 2.25±2.30** | 0.58±0.90 |

*: p<0.05 vs Wild type

**: p<0.05 vs Without metastasis
