# Supplementary material for: Loss of NDRG2 Expression Confers Oral Squamous Cell Carcinoma with Enhanced Metastatic Potential
Source: Oxford University Press journal article supplement (doi:10.1158/0008-5472.can-16-2114), 2017-02-16
Supplement: 00085472can162114-sup-169538_1_supp_3813808_2jf8bz.docx [file 00085472can162114-sup-169538_1_supp_3813808_2jf8bz.docx]

**Supplemental Methods and Materials**

***Reverse-transcription polymerase chain reaction (RT-PCR) and Quantitative real-time PCR analysis***

The primers used were as follows:

β-actin forward, 5’-TCCTTCTGCATCCTGTCGGC-3’,

β-actin reverse, 5’-AAGAGATGGCCACGGCTGCT-3’;

TWIST1 forward, 5’-GGCTCAGCTACGCCTTCTC-3’,

TWIST1 reverse, 5’-TCCTTCTCTGGAAACAATGACA-3’;

NDRG2 forward, 5’-GAGATATGCTCTTAACCACCCG-3’,

NDRG2 reverse, 5’-GCTGCCCAATCCATCCAA-3’;

E-Cadherin forward, 5’-CTGAGAACGAGGCTAACG-3’,

E-Cadherin reverse, 5’-GTCCACCATCATCATTCAATAT-3’;

N-Cadherin forward, 5’- ATCCTACTGGACGGTTCG -3’,

N-Cadherin reverse, 5’-TTGGCTAATGGCACTTGA-3’;

Vimentin forward, 5’- GGAAATGGCTCGTCACCTTCGT-3’,

Vimentin reverse, 5’- AGAAATCCTGCTCTCCTCGCCT -3’;

Snail forward, 5’- ACAAGCACCAAGAGTCCG-3’,

Snail reverse, 5’- ATGGCAGTGAGAAGGATGTG-3’.
